# Supplementary material for: Hazard Identification Related to the Presence of Vibrio spp., Biogenic Amines, and Indole-Producing Bacteria in a Non-Filter Feeding Marine Gastropod (Tritia mutabilis) Commercialized on the Italian Market
Source: MDPI journal article supplement (doi:10.3390/foods10112574), 2021-10-25
Supplement: s1 [file s1]

**Table S1.** Target genes and oligonucleotide primers utilized in the study.

| <i>Vibrio</i> species      | Target Gene<br>Specie/Virulence <sup>a</sup> | Primers <sup>b</sup>        | Sequence                                            | Ampl (bp) | References <sup>c</sup>           |
|----------------------------|----------------------------------------------|-----------------------------|-----------------------------------------------------|-----------|-----------------------------------|
| <i>V. cholera</i>          | <i>toxR</i> -C (S)                           | toxR-F                      | CCTTCGATCCCCCTAAGCAATAC                             | 779       | Rivera et al., 2001 <sup>c</sup>  |
|                            |                                              | toxR-R                      | AGGGTTAGCAACGATGCGTAAG                              |           |                                   |
|                            | <i>ctxA</i> (V)                              | ctxA-F                      | CGGGCAGATTCTAGACCTCCTG                              | 564       | Fields et al., 1992 <sup>d</sup>  |
|                            |                                              | ctxA-R                      | CGATGATCTTGGAGCATTCCCAC                             |           |                                   |
|                            | <i>ctxB</i> (V)                              | ctxB-F                      | GGTTGCTTCTCATCATCGAACCAC                            | 460       | Olsvik et al. (1993) <sup>e</sup> |
|                            |                                              | ctxB-R                      | GATACACATAATAGAATTAAGGATG                           |           |                                   |
|                            | <i>stn/sto</i> (V)                           | stn/sto67-F<br>stn/sto194-R | GCTGGATTGCAACATATTTTCGC<br>TCGCATTTAGCCAAACAGTAGAAA | 172       | Rivera et al., 2001 <sup>c</sup>  |
| <i>V. parahaemolyticus</i> | <i>toxR</i> -P (S)                           | toxR-F                      | GTCTTCTGACGCAATCGTTG                                | 368       | Kim et al., 1999 <sup>f</sup>     |
|                            |                                              | toxR-R                      | ATACGAGTGTTGCTGTCATG                                |           |                                   |
|                            | <i>tdh</i> (V)                               | tdh-F                       | GTAAAGGTCTCTGACTTTTGGAC                             | 269       | Bej et al., 1999 <sup>g</sup>     |
|                            |                                              | tdh-R                       | TGGAATAGAACCTTCATCTTCACC                            |           |                                   |
|                            | <i>trh</i> (V)                               | trh-F                       | TTGGCTTCGATATTTTCAGTATCT                            | 500       | Bej et al., 1999 <sup>g</sup>     |
|                            |                                              | trh-R                       | CATAACAAACATATGCCCATTTCCG                           |           |                                   |
| <i>V. vulnificus</i>       | <i>vvhA</i> (S)                              | Vvh785-F<br>Vvh1303-R       | CCGCGGTACAGTTGGCGCA<br>CGCCACCCACTTTCGGGCC          | 519       | Han & Ge, 2010 <sup>h</sup>       |

<sup>a</sup>Specie markers (S), virulence markers (V);

<sup>b</sup>Oligonucleotide primers and PCR conditions: a small amount of the purified strain was picked from the plate and transferred in 100 µL of sterile H<sub>2</sub>O. The DNA was extracted by the boiling method at 100°C for 15 min, stored 2-3 min at -20°C and then centrifuged at 5000 × g at 4°C for 15 min, recovering the supernatant. Bacterial lysates were stored at -20°C until use. For the PCR reactions 1 µL of each lysate was suspended with 2.5 µL 10X PCR Rxn Buffer (Invitrogen, Carlsbad, CA, USA), 1 µL MgSO<sub>4</sub> (Invitrogen), 0.5 µL dNTPs 100 Mm (Invitrogen), 1 µL of each primer, 0.2 µL of Taq-DNA Polymerase (Invitrogen), and sterile H<sub>2</sub>O to the mark of 25 µL. PCR reactions were electrophoresed at 100 V for 30 min on 1.5% agarose gel utilizing tris-acetate-ethylenediaminetetraacetic acid (TAE) buffer (Sigma Aldrich, St. Louis, MO, USA); Gel Red Nucleic Acid Stain (Biotium, Hayward, CA, USA) was utilized as fluorescent nucleic acid stain, and bromophenol blue with 30% glycerol in PCR water and TrackIt™ 100 bp DNA Ladder (Invitrogen) as loading buffer. The PCR products were evidenced by the transilluminator Bio-Rad Gel Doc™ XR, Trans-UV at 302 nm;

<sup>c</sup>Rivera, I.N.; Chun, J.; Huq, A.; Sack, R.B.; Colwell, R.R. Genotypes Associated with Virulence in Environmental Isolates of *Vibrio cholerae*. *Appl. Environ. Microb.* **2001**, *67*, 2421-2429, [https://doi: 10.1128/AEM.67.6.2421-2429.2001](https://doi.org/10.1128/AEM.67.6.2421-2429.2001); <sup>d</sup>Fields, P.I.; Popovic, T.; Wachsmuth, K.; Olsvik, O. Use of polymerase chain reaction for detection of toxigenic *Vibrio cholerae* O1 strains from the Latin American cholera epidemic. *J. Clin. Microbiol.* **1992**, *30*, 2118-2121, [https://doi: 10.1128/jcm.30.8.2118-2121.1992](https://doi.org/10.1128/jcm.30.8.2118-2121.1992); <sup>e</sup>Olsvik, O.; Wahlberg, J.; Petterson, B.; Uhlén, M.; Popovic, T.; Wachsmuth, I.K.; Fields, P.I. Use of automated sequencing of polymerase chain reaction-generated amplicons to identify three types of cholera toxin subunit B in *Vibrio cholerae* O1 strains. *J. Clin. Microbiol.* **1993**, *31*, 22–25, [https://doi: 10.1128/jcm.31.1.22-25.1993](https://doi.org/10.1128/jcm.31.1.22-25.1993); <sup>f</sup>Kim, Y.B.; Okuda, J.; Matsumoto, C.; Takahashi, N.; Hashimoto, S.; Nishibuchi, M. Identification of *Vibrio parahaemolyticus* strains at the species level by PCR targeted to the *toxR* gene. *J. Clin. Microbiol.* **1999**, *37*, 1173-1177, [https://doi: 10.1128/JCM.37.4.1173-1177.1999](https://doi.org/10.1128/JCM.37.4.1173-1177.1999); <sup>g</sup>Bej, A.K.; Patterson, D.P.; Brasher, C.W.; Vickery, M.C.; Jones, D.D.; Kaysner, C.A. Detection of total and hemolysin-producing *Vibrio parahaemolyticus* in shellfish using multiplex PCR amplification of *tl*, *tdh* and *trh*. *J. Microbiol. Meth.* **1999**, *36*, 215-225, [https://doi: 10.1016/s0167-7012\(99\)00037-8](https://doi.org/10.1016/s0167-7012(99)00037-8); <sup>h</sup>Han, F.; Ge, B. Multiplex PCR assays for simultaneous detection and characterization of *Vibrio vulnificus* strains. *Lett. Appl. Microbiol.* **2010**, *5*, 234-240. [https://doi: 10.1111/j.1472-765X.2010.02887.x](https://doi.org/10.1111/j.1472-765X.2010.02887.x).
